# Supplementary material for: Differences in expression rather than methylation at placenta-specific imprinted loci is associated with intrauterine growth restriction
Source: PubMed Central journal article supplement (PMC6390544; doi:10.1186/s13148-019-0630-4), 2019-02-26

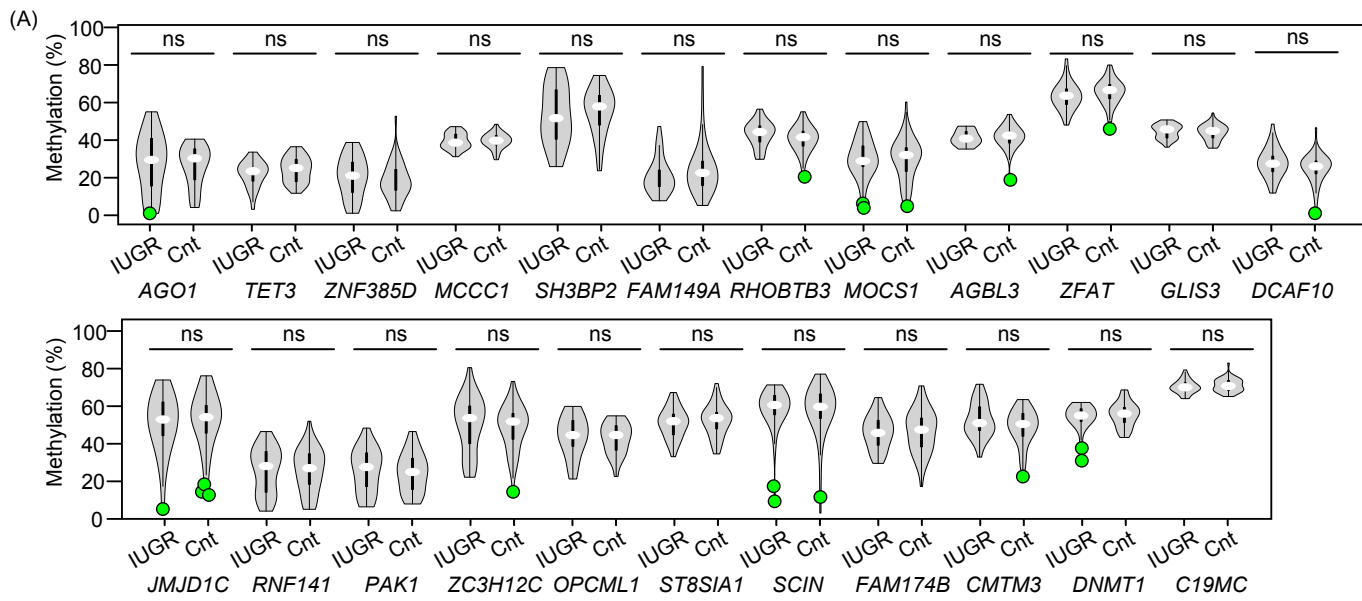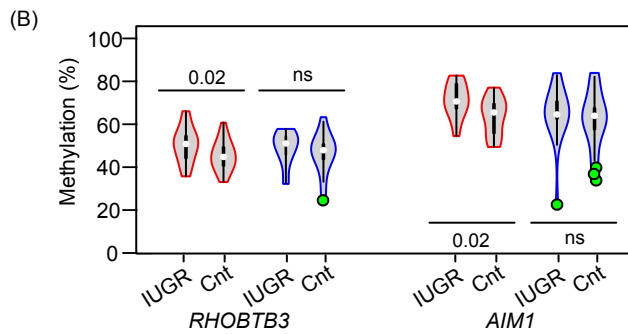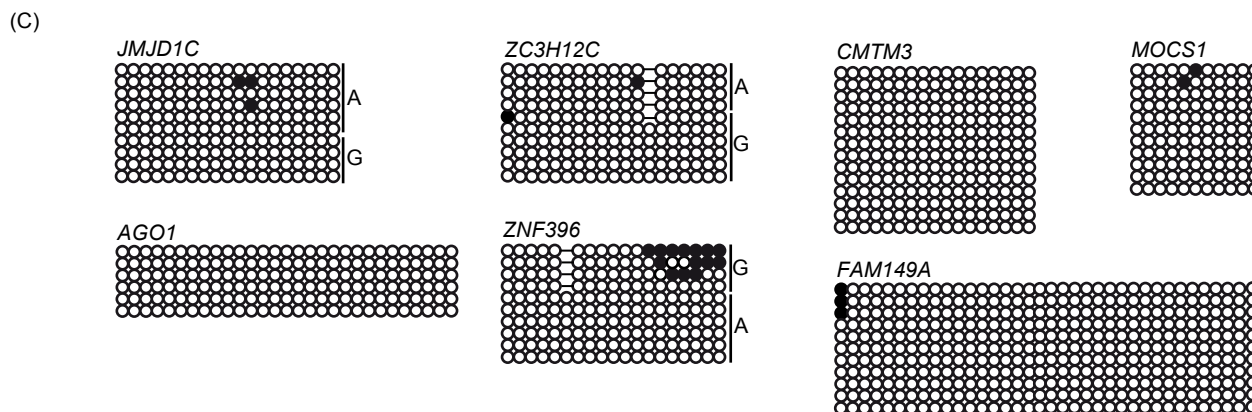

Supplement: 13148_2019_630_MOESM5_ESM.pdf [file 13148_2019_630_MOESM5_ESM.pdf]
